# Supplementary material for: Divergent impacts of ocean tipping and global warming on habitability
Source: Research Square preprint supplement (doi:10.21203/rs.3.rs-4402479/v1), 2024-08-05
Supplement: Supplementary file 1 [file 262d61a6821c8a05def468c5.docx]

**Supporting Information for:**

**Divergent impacts of ocean tipping and global warming on habitability**

Jesse F. Abrams1,*, Chi Xu2, Chris A. Boulton1, Marten Scheffer3,4, Paul D.L. Ritchie5, Mark S. Williamson1,5, Ashish Ghadiali1, Laura Jackson6, Jennifer V. Mecking7, Timothy M. Lenton1

1 Global Systems Institute, University of Exeter, Exeter, EX4 4QE, UK

2 School of Life Sciences, Nanjing University, Nanjing 210023, China

3 Santa Fe Institute, Santa Fe, NM 87501, USA

4 Wageningen University, NL-6700 AA, Wageningen, The Netherlands

5 Faculty of Environment, Science and Economy, University of Exeter, Exeter, UK

6 Met Office, Exeter, UK

7 National Oceanography Centre, Southampton, UK

*Corresponding author: Jesse F. Abrams

Email: [j.abrams@exeter.ac.uk](mailto:j.abrams@exeter.ac.uk)


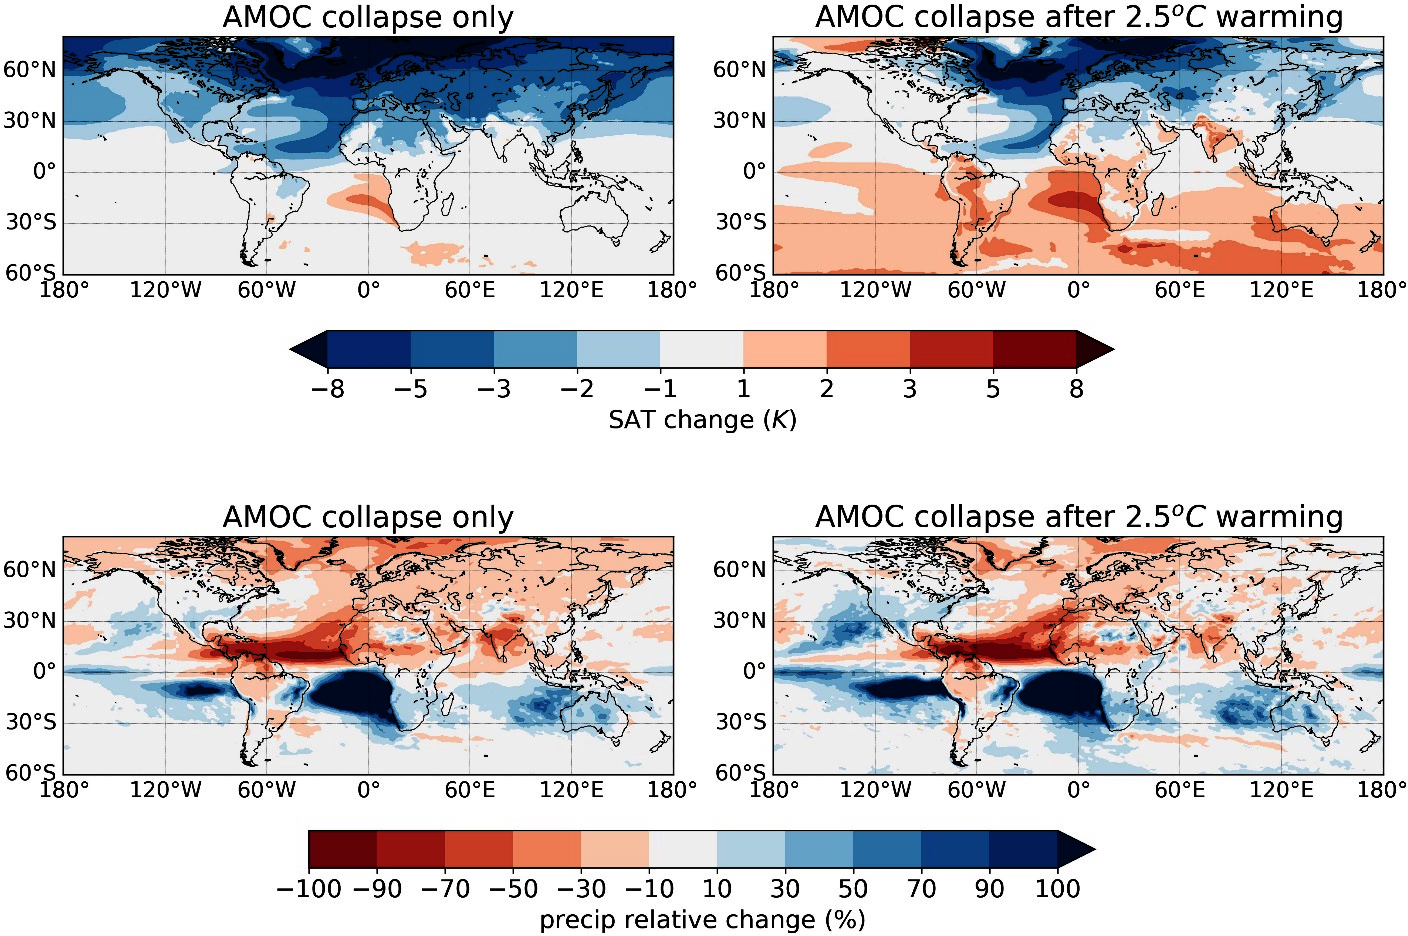


***Figure S1.*** *Surface air temperature (SAT, top row) and precipitation (bottom row) response to AMOC-collapse scenarios. Left column, the climatic impacts of just an AMOC collapse without the additional global warming most likely to accompany a collapse in any realistic future scenario is isolated. The isolated impacts of an AMOC collapse are analyzed by taking the difference of 30-year means of the control run and the AMOC- off run, once the simulation is approximately stationary, performed by the HadGEM3-GC2 model. Right column, the analysis is expanded to include the impacts of an AMOC collapse against a more realistic future climate state, accounting for the additional effects of global warming using the future scenario SSP1-2.6 in the model HadGEM3-GC31-MM. The forcing scenario SSP1-2.6 refers to Shared Socio-economic Pathway SSP1 and Regional Concentration Pathway RCP2.6 - a low-emissions pathway with high sustainability. Under the SSP1-2.6 scenario, HadGEM3-GC31-MM reaches a mean global warming of 2.5°C above pre-industrial levels by the end of the century (2071-2100). This warming pattern is overlaid to the impacts of an AMOC collapse to establish the overall impact if the AMOC were to collapse after 2.5°C global warming relative to the present-day climate (2006-35).*

***
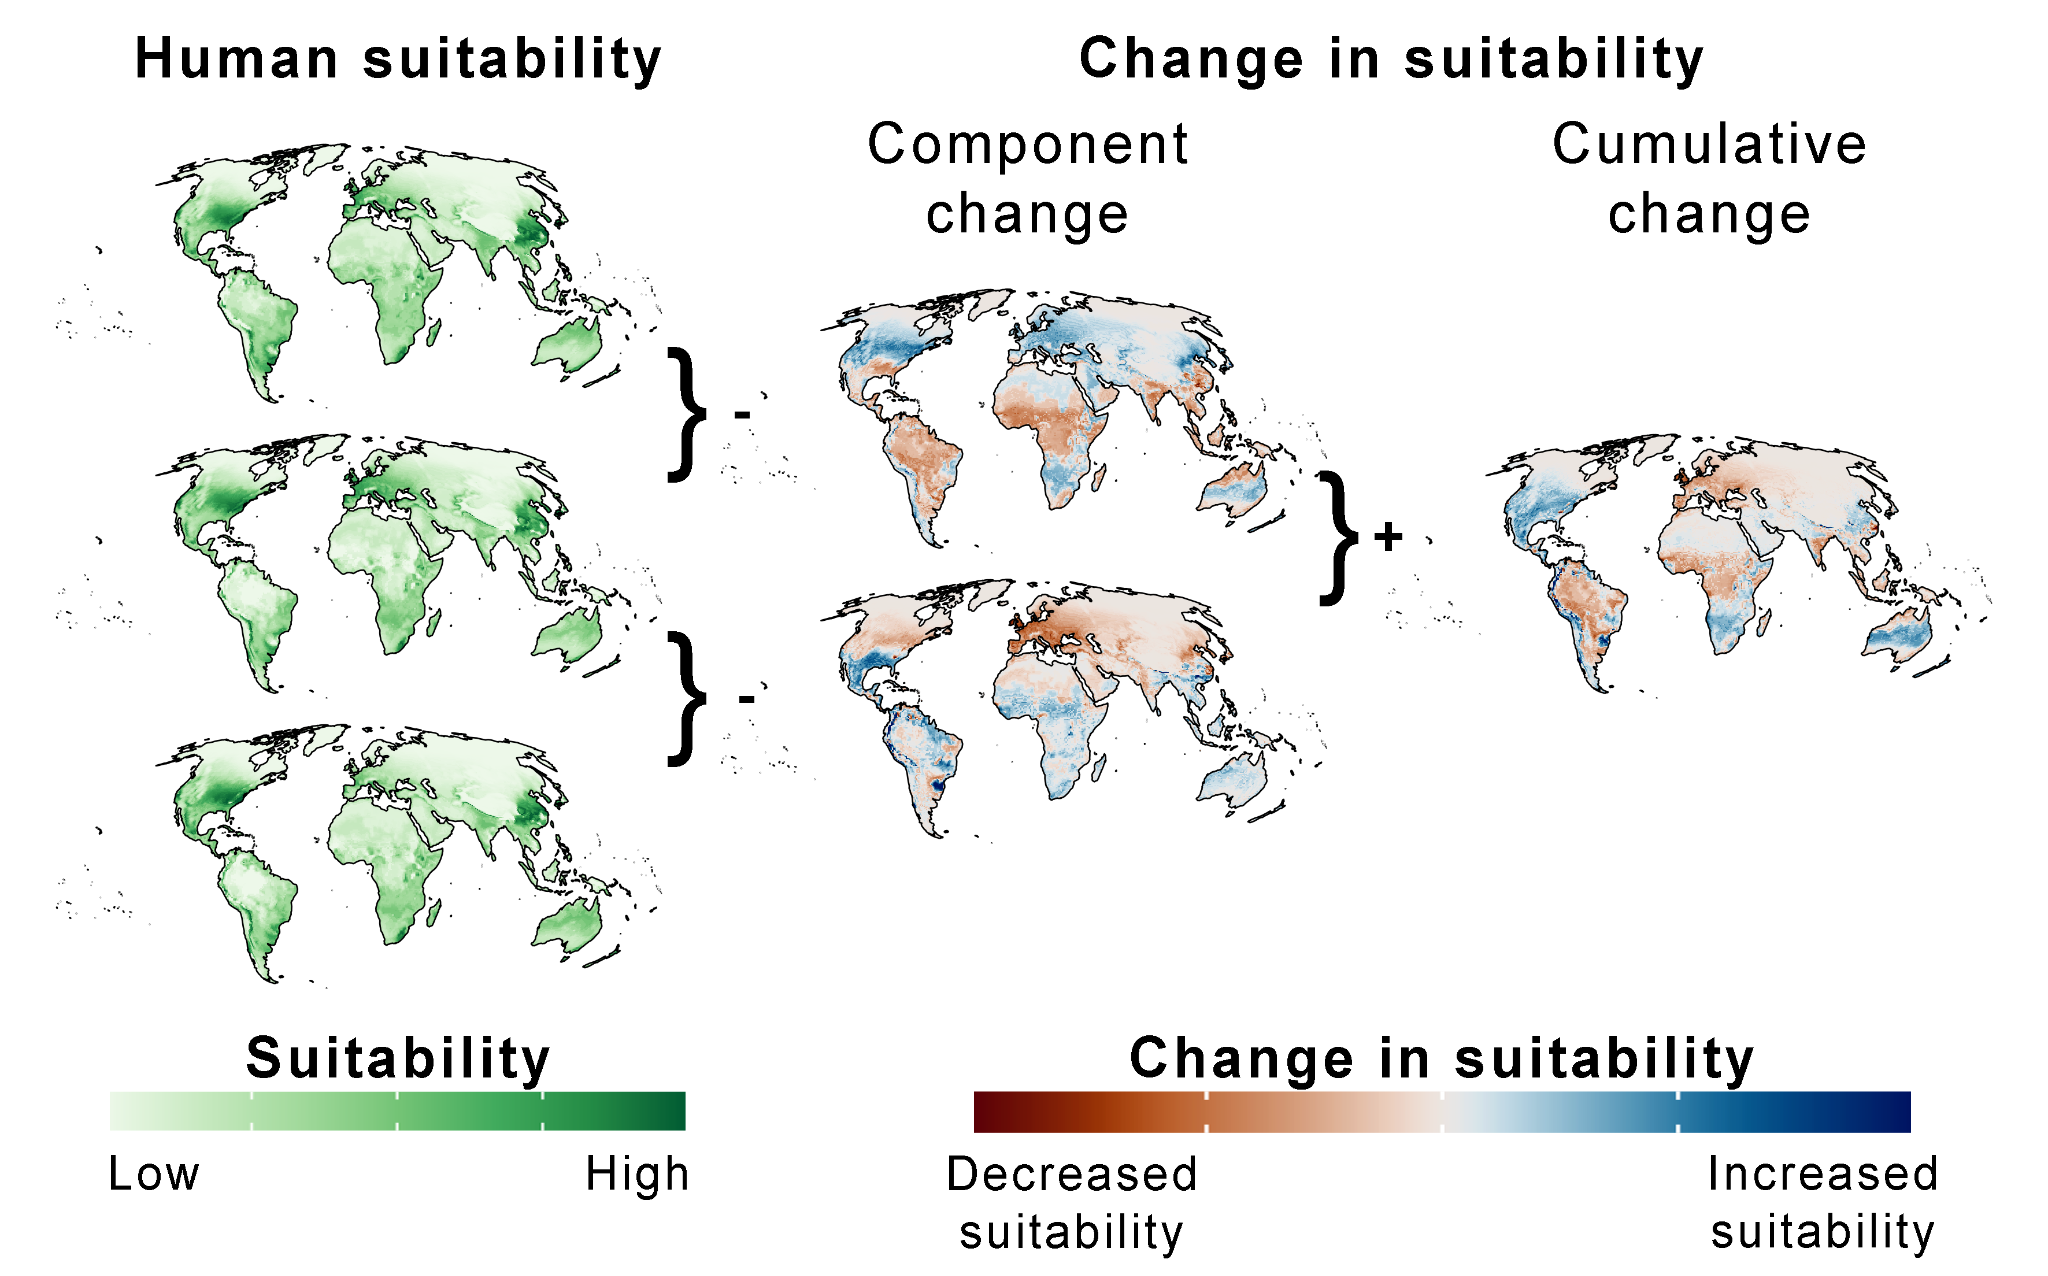
***

***Figure S2.*** *The modeled human MAT-MAP niche. The first column shows human suitability for three scenarios: the mean climate from 1990-2015, 2.5ºC warming above pre-industrial temperatures according to SSP1-2.6, and the simulated collapse of the AMOC. The second column shows the change in human suitability as a result of 2.5ºC warming and AMOC collapse in isolation, while the third column shows the cumulative effect of AMOC collapse following 2.5ºC warming. The climate niches are calculated using 30-year means of the control run and the AMOC-off run, once the simulation is approximately stationary, performed by the HadGEM3-GC2 model. The isolated impacts of the AMOC collapse without any additional warming is a theoretical simulation as additional warming would be necessary to trigger the collapse of the AMOC.*

**
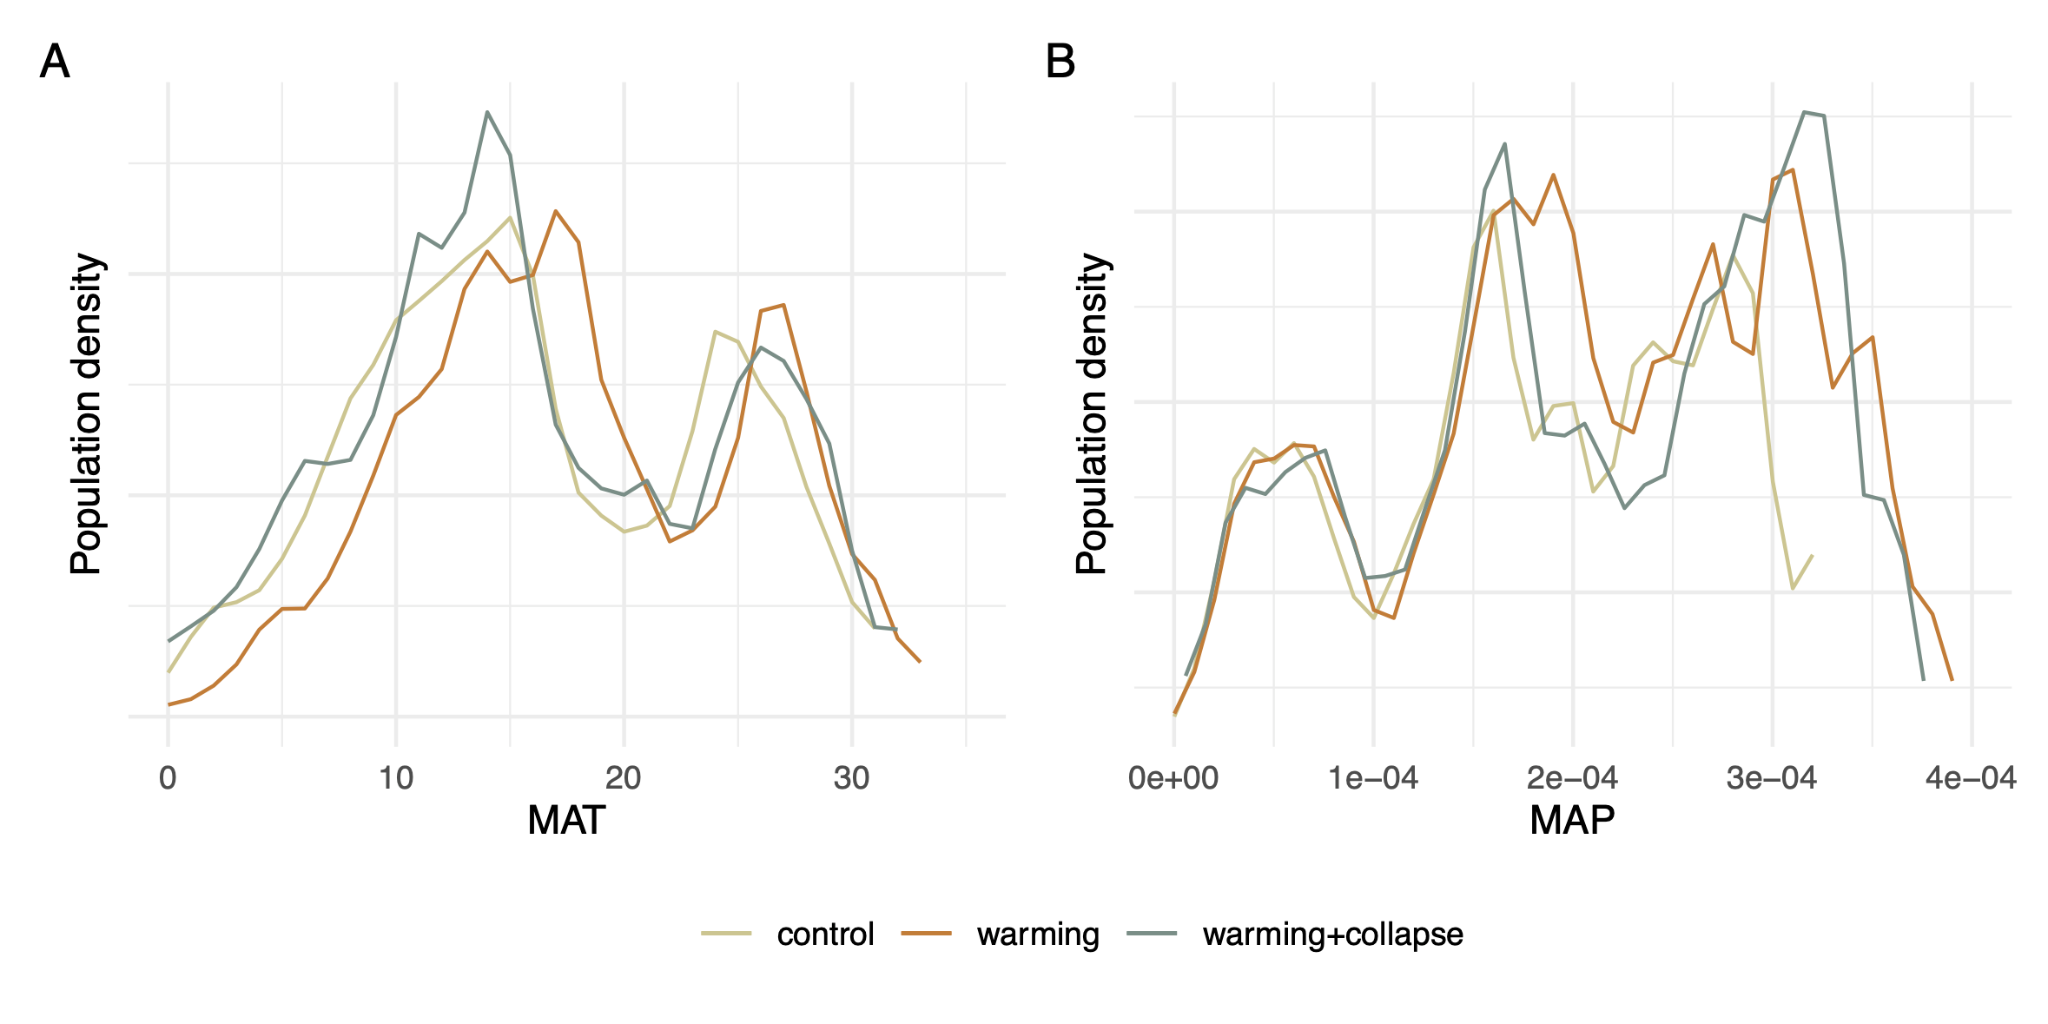
**

***Figure S3. The change in human exposure to different MAT and MAP.*** *Under control conditions human population density had two distinct MAT (panel A) maximums at ~15°C and ~25°C. Under the warming scenario these shift upwards to ~18°C and ~28°C, while under both the AMOC collapse and combined scenarios these shift to colder temperatures. For MAP (panel B), the results are not as clear with a more even distribution across the range of values. However, under all scenarios there is a shift towards a higher percentage of the population being exposed to wetter conditions.*
